# Supplementary material for: Determination of Genotoxic Impurity N-Nitroso-N-methyl-4-aminobutyric Acid in Four Sartan Substances through Using Liquid Chromatography–Tandem Mass Spectrometry
Source: MDPI journal article supplement (doi:10.3390/molecules27217498), 2022-11-03
Supplement: s1 [file s1]

# Determination of Genotoxic Impurity N-nitroso-N-methyl-4-aminobutyric Acid in Four Sartan Substances through Using Liquid Chromatography–Tandem Mass Spectrometry

Bin Xie <sup>1</sup>, Dong Guo <sup>2</sup>, Binliang Mai <sup>2</sup> and Jun Fan <sup>2,\*</sup>

<sup>1</sup> Zhuhai Rundu Pharmaceutical Co. Ltd., Zhuhai 519041, China

<sup>2</sup> Department of Chemistry, School of Chemistry, South China Normal University, Guangzhou 510006, China

\* Correspondence: fanj@scnu.edu.cn; Tel./Fax: +86-20-39310187

**Table S1.** HPLC gradient in this work.

| <i>t</i> (min) | Mobile Phase A* (%) | Mobile Phase B *(%) |
|----------------|---------------------|---------------------|
| 0.0            | 95                  | 5                   |
| 1.0            | 95                  | 5                   |
| 5.0            | 0                   | 100                 |
| 6.5            | 0                   | 100                 |
| 6.6            | 95                  | 5                   |
| 9.0            | 95                  | 5                   |

\*Mobile phase A, formic acid/water =2/998 (*v/v*);

\*Mobile phase B, acetonitrile/methanol =200/800 (*v/v*).

**Table S2.** Comparison of LOD and LOQ for NMBA by APCI and ESI source.

| Ion Source        | NMBA      |             |             |
|-------------------|-----------|-------------|-------------|
|                   | Response* | LOD (ng/mL) | LOQ (ng/mL) |
| APCI <sup>+</sup> | 85327     | 0.9         | 3.0         |
| ESI <sup>+</sup>  | 69654     | 2.0         | 5.0         |

\*Response at 30 ng/mL NMBA.

**Table S3.** Determination results of NMBA content of commercial sartans substances.

| Sample                | Batch Number | Detect Concentration (ng/mL) |
|-----------------------|--------------|------------------------------|
| Candesartan cilexetil | 61118110102  | N.D.                         |
|                       | 61118110103  | N.D.                         |
|                       | 61118110104  | N.D.                         |
|                       | 61118110105  | N.D.                         |
| Olmesartan medoxomi   | 80319010514  | N.D.                         |
|                       | 80319020501  | N.D.                         |
|                       | 80319020502  | N.D.                         |
| Irbesartan            | 80319010514  | N.D.                         |
|                       | 80319020501  | N.D.                         |
|                       | 80319020502  | N.D.                         |
| Valsartan             | 67819030610  | N.D.                         |
|                       | 67819030611  | N.D.                         |
|                       | 67819030612  | N.D.                         |
|                       | 67819030613  | N.D.                         |

N.D.—not detected.

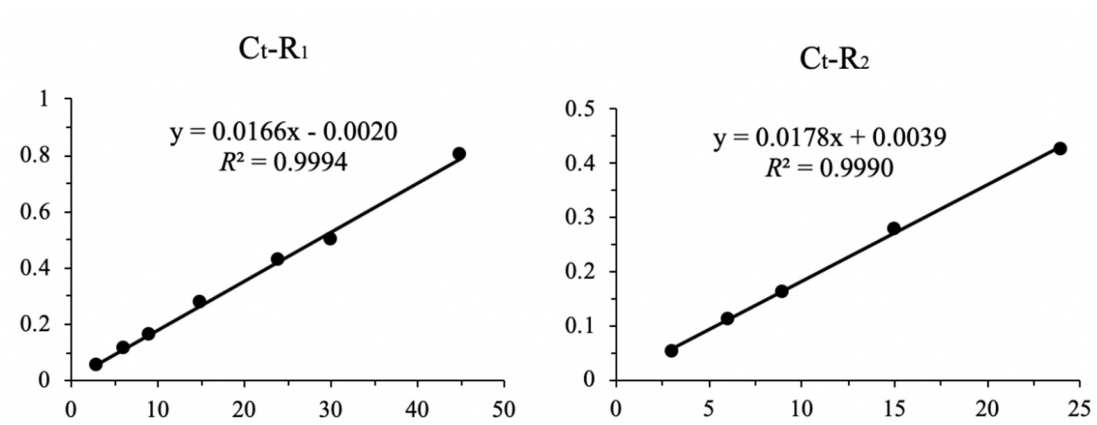

**Figure S1.** Standard curves of NMBA. (A) K1-K7; (B) K1-K5.
